1     **Structural insight into the mechanism of neuraminidase inhibitor-resistant mutations in**  
2                                   **human-infecting H10N8 Influenza A virus**

3 Babayemi O. Oladejo<sup>1,2, ¶</sup>, Yuhai Bi<sup>1,3,4, ¶</sup>, Christopher J. Vavricka<sup>5</sup>, Chunrui Li<sup>1</sup>, Yan Chai<sup>1</sup>, Kun  
4 Xu<sup>2,6</sup>, Liqiang Li<sup>7,8</sup>, Zhe Lu<sup>7,9</sup>, Jiandong Li<sup>7,8</sup>, Gary Wong<sup>1,3</sup>, Sankar Mohan<sup>10</sup>, B. Mario Pinto<sup>10</sup>,  
5 Haihai Jiang<sup>1,11</sup>, Jianxun Qi<sup>1</sup>, George Fu Gao<sup>1,2,3,4,11,12</sup>, Po Tien<sup>1,2,\*</sup> and Yan Wu<sup>3,6,\*</sup>

6

7 1. CAS Key Laboratory of Pathogenic Microbiology and Immunology, Institute of Microbiology,  
8 Chinese Academy of Sciences, Beijing 100101, China

9 2. University of Chinese Academy of Sciences, Beijing 100049, China

10 3. Shenzhen Key Laboratory of Pathogen and Immunity, Shenzhen Third People's Hospital,  
11 Shenzhen 518112, China

12 4. Center for Influenza Research and Early-warning (CASCIRE), Chinese Academy of Sciences,  
13 Beijing 100101, China

14 5. Graduate School of Science, Technology and Innovation, Kobe University, Kobe Japan

15 6. Research Network of Immunity and Health (RNIH), Beijing Institutes of Life Science, Chinese  
16 Academy of Sciences, Beijing 100101, China

17 7. BGI-Shenzhen, Shenzhen 518083, China

18 8. China National Genebank, BGI-Shenzhen, Shenzhen 518083, China

19 9. Qingdao University-BGI Joint Innovation College, Qingdao University, Qingdao 266071, China

20 10. Department of Chemistry, Simon Fraser University, Burnaby, BC, Canada

21 11. College of Veterinary Medicine, China Agricultural University, Beijing 100193, China

22 12. National Institute for Viral Disease Control and Prevention, Chinese Center for Disease

23 Control and Prevention (China CDC), Beijing 102206, China

24

25 \*Corresponding authors

26 E-mail: [wuy@biols.ac.cn](mailto:wuy@biols.ac.cn), [tienpo@im.ac.cn](mailto:tienpo@im.ac.cn)

27

28 ¶These authors contributed equally to this work.

## 29 **Abstract**

30 The emergence of drug resistance in avian influenza virus (AIV) is a serious concern for public  
31 health. Neuraminidase (NA) isolated from a fatal case of avian-origin H10N8 influenza virus  
32 infection was found to carry a drug-resistant mutation, NA-Arg292Lys (291 in N8 numbering). In  
33 order to understand the full potential of H10N8 drug resistance, the virus was first passaged in the  
34 presence of the most commonly used neuraminidase inhibitors (NAIs), oseltamivir and zanamivir.  
35 As expected, the Arg292Lys substitution was detected after oseltamivir treatment, however a novel  
36 Val116Asp substitution (114 in N8 numbering) was selected by zanamivir treatment. Next  
37 generation sequencing (NGS) confirmed that the mutations arose early (after passages 1-3) and  
38 became dominant in the presence of the NAI inhibitors. Extensive crystallographic studies  
39 revealed that N8-Arg292Lys resistance results mainly from loss of interactions with the inhibitor  
40 carboxylate, while rotation of Glu276 was not impaired as observed in the N9-Arg292Lys, a group  
41 2 NA structure. In the case of Val116Asp, the binding mode between oseltamivir and zanamivir is  
42 different. Asp151 forms stabilized hydrogen bond to guanidine group of zanamivir, which may  
43 compensate the resistance caused by Val116Asp. By contrast, the amino group of oseltamivir is  
44 too short to maintain this hydrogen bond, which result in resistant. Moreover, the oseltamivir-  
45 zanamivir hybrid inhibitor MS-257 displays higher effectiveness to Val116Asp than oseltamivir,  
46 which support this notion.

## 47 **Author Summary**

48 Aside from vaccination, NAIs are currently the only alternative for the clinical treatment and  
49 prophylaxis of influenza. Understanding the mechanisms of resistance is critical to guide in drug  
50 development. In this study, two drug-resistant NA substitutions, Val116Asp and Arg292Lys, were  
51 discovered from oseltamivir and zanamivir treatment of H10N8 virus. Crystal structural analyses  
52 revealed two distinct mechanisms of these two resistant mutations and provide the explanation for  
53 the difference in susceptibility of different NAIs. Zanamivir and laninamivir were more effective  
54 against the resistant variants than oseltamivir, and Arg292Lys results in more serious oseltamivir  
55 resistance in N9 than N8 subtype. This study is well-correlated to influenza pandemic/epidemic  
56 pre-warning, as the discovery of inhibitor resistant viruses will help for new drug preparedness.

## 57 **Introduction**

58 Four NAIs, oseltamivir, zanamivir, peramivir and laninamivir, are currently available for the  
59 clinical treatment of influenza virus infections [1-4]. Oseltamivir has been extensively used due to  
60 its high oral bioavailability [5], however resistance to both oseltamivir and peramivir is prevalent.  
61 On the other hand, although zanamivir and laninamivir offer advantages in terms of drug  
62 resistance, both inhibitors are highly polar in their active forms and therefore have lower  
63 bioavailability. Furthermore, there are still many known substitutions that lead to zanamivir and  
64 laninamivir resistance including Glu119Gly/Ala/Asp, Gln136Lys, Asp151Ala/Asn/Gly/Val,  
65 Arg152Lys, Ile222Arg, Asp198Asn, Arg292Lys and Arg371Lys (N2 numbering) [6-10].

66 Resistance to NAIs usually results from substitutions of highly conserved amino acid residues that  
67 form the NA active site. The influenza NA active site contains 8 conserved catalytic residues, and  
68 an additional frame of 11 residues that provides structural support to the active site [11, 12].  
69 Substitution of non/semi-conserved residues has also been shown to lead to NAI resistance [13].  
70 Semi-conserved influenza NA residues such as Ile117 and Lys150 have been observed to confer  
71 NAI resistance in N1 subtype NA[14, 15], while Gln136 has been observed in both N1 [16] and  
72 N2 [17] NA subtypes. However, the mechanisms of drug resistance related to semi-conserved  
73 residues are poorly understood [6, 18, 19].

74 In recent years, some new AIVs, either highly pathogenic (HPAIV) or low pathogen AIV  
75 (LPAIV), have emerged with ability to infect humans in addition to H5N1 HPAIV[20-24], due to  
76 extensive poultry transportation and wild bird migration [25]. LPAIV H10N8 human-infecting  
77 cases were identified in Jiangxi Province, China in 2013 [24, 26]. In December 2013, A/Jiangxi-  
78 Donghu/346/2013/H10N8 with the NA-Arg292Lys (N2 numbering, 291 in N8 numbering)

79 mutation was discovered in the trachea aspirate of a 73-year-old patient who died 3 days following  
80 oseltamivir treatment [27]. Therefore, H10N8 and other avian-origin influenza A viruses possess  
81 a high potential for human pathogenicity and hence pose public health concern.

82 There are two phylogenetic groups of influenza A NAs (N1, N4, N5 and N8 belong to group 1,  
83 while N2, N3, N6, N7 and N9 belong to group 2) [28]. Arg292Lys has been widely reported in  
84 group 2 NAs (N2 and N9), while the report of Arg292Lys in a group 1 NAs has never been  
85 observed in nature. Structural analysis of N9-Arg292Lys has been shown to result in unfavorable  
86 Glu276 conformation for oseltamivir binding [10]. However, the mechanism of Arg292Lys  
87 resistance in a group 1 N8 is not well understood due to lack of crystal structures (apo and holo).

88 In this study, we explored the potential drug-resistant substitutions of A/Jiangxi-  
89 Donghu/346/2013/H10N8 by passaging the virus in the presence of zanamivir and oseltamivir,  
90 respectively. Besides the clinical Arg292Lys substitution which was identified after *in vitro*  
91 oseltamivir treatment, a novel Val116Asp substitution was also identified after zanamivir  
92 treatment. The residue 116 (residue 114 in N8 numbering) does not play a direct role in active site  
93 framework or drug binding and therefore the mechanism underlying Val116Asp resistance is  
94 perplexing. We have determined the binding capability ( $K_m$ ) of N8 wildtype and two substitutions.  
95 The data indicated that Val116Asp and Arg292Lys mutations reduce the affinity between the  
96 enzyme and substrate, which results from the conformational shift of the key residues in the active  
97 site. Moreover, the inhibition assay demonstrated that the oseltamivir resistance (1,000-fold)  
98 caused by Arg292Lys in N8 is much less severe than that of H7N9 (100,000-fold). We have also  
99 determined the *apo* crystal structures of N8 wild type and the two mutants and the *holo* structures  
100 in complex with oseltamivir, zanamivir, peramivir and laninamivir. These crystal structures reveal

101 the underlying mechanism by which Arg292Lys and Val116Asp mutations develop resistance  
102 towards NAIs.

## 103 **Results**

### 104 ***In vitro* NAI Selective Pressure**

105 H10N8 virus was subjected to 2-fold increases in the concentration of oseltamivir (80-10240  $\mu$ M)  
106 and zanamivir (20-2560  $\mu$ M) over 8 passages. Prior quantification by plaque assays showed that  
107 the virus was resistant to oseltamivir at 13.3  $\mu$ M and zanamivir at 1.33  $\mu$ M. After each passage,  
108 the hemagglutinin (HA) titer was determined, recorded in triplicate and used to estimate the  
109 concentration of virus to be seeded in the next passage. A negative HA titer was observed in the  
110 last passage indicating the absence of virus (S1 Table).

### 111 **Substitutions under NAI Pressure**

112 Viruses from each passage under inhibitor treatment were subject to high-throughput sequencing  
113 for whole genome substitution and intra-cell substitution analysis. The result showed that as  
114 expected, the drug-resistant Arg292Lys substitution in NA was detected after oseltamivir  
115 treatment; however, a novel NA Val116Asp substitution arose after zanamivir treatment,  
116 suggesting a direct role in zanamivir-resistance (S1 Fig). The Arg292Lys mutation under  
117 oseltamivir treatment and the Val116Asp mutation under zanamivir treatment arose and became  
118 dominant quickly (1-3 passages). Unexpectedly, the pre-exist frequency of Arg292Lys was found  
119 to be at 28 % in the non-drug treatment control. However, just after 1 passage under oseltamivir  
120 treatment, it increased to 92% and levelled off at 92% throughout the next 6 oseltamivir treatment  
121 passages (Fig 1A and 2). For zanamivir treatment, the pre-exist frequency of Val116Asp was found

122 to be at 2%; after 1 passage, it increased quickly to 34%, and became absolute dominant (90%)  
123 (Fig 1B and 2).

124 In addition to these two NA substitutions, several substitutions occurred on the HA and other  
125 certain internal genes. Two HA substitutions, Lys167Glu and Ile413Thr, were pre-existing at the  
126 frequency of 49% and 48% respectively, and both became dominant under oseltamivir/ zanamivir  
127 treatment and kept steady along cell passages with the increase of drug concentration. Importantly,  
128 Val139Ile in Polymerase basic protein 2 (PB2) arose and became dominant in the first passage of  
129 zanamivir treatment, with the frequency of 81%. However, this was not observed in oseltamivir  
130 treatment passages. One common substitution Cys95Phe in Polymerase acidic protein (PA)  
131 occurred in both treatment passages. PA Cys95Phe also pre-existed in the drug-free treatment with  
132 frequency of 12%, which showed a slow increasing trend and became dominant at passage 7 in  
133 oseltamivir treatment. Meanwhile, in zanamivir treatment passages, it became absolute dominant  
134 within 3 passages and levelled off. Another PA substitution Val91Leu was only observed in  
135 oseltamivir treatment. This mutation pre-existed in the drug-free treatment control at a frequency  
136 of 10% and showed a fluctuating trend along passages. Other two substitutions, HA Gly89Arg and  
137 M1 Gln158Arg also showed fluctuating trends along oseltamivir treatment passages. Fluctuating  
138 trends for HA Gly89Arg mutation was also observed in zanamivir treatment passages (S1 Fig and  
139 Fig 2).

140 Collectively, we can find that most of these substitutions are pre-existing in the original NAI-free  
141 cultures. These pre-existing substitutions might be the natural selection pools when under drug  
142 treatment. Correlation analysis of these substitutions using their frequencies values found several  
143 strong links: one negative link between HA 179Arg and M1 Gln158Arg, one negative link between  
144 HA 179Arg and PA Cye95Phe along oseltamivir treatment; one positive link between NA



145 V116Asp and 292Arg. These results suggest that synergy might exist along the dynamic changes  
146 of these substitutions, which will be further studied in the future.

### 147 **Reduced Substrate Affinity and Inhibition of N8-Arg292Lys and N8-Val116Asp**

148 NA was prepared according to the previously reported methods [29-31]. Lower substrate affinity  
149 was observed for N8-Arg292Lys (30-fold) and Val116Asp (6-fold) mutants when compared to the  
150 wildtype N8. The recombinant Val116Asp and Arg292Lys variants also exhibited reduced  
151 sensitivity to the four clinically used NAIs (oseltamivir, zanamivir, peramivir and laninamivir)  
152 relative to the wildtype. The Arg292Lys mutant exhibited higher resistance to all of the four NAIs  
153 compared to the Val116Asp mutant. Both mutants showed high resistance to oseltamivir, with a  
154 926-fold and 128-fold increase in mean  $IC_{50}$  for Arg292Lys and Val116Asp, respectively.  
155 Val116Asp was moderately resistant to zanamivir (40-fold) while Arg292Lys displays much  
156 higher zanamivir resistance (704-fold). The resistance pattern of Val116Asp and Arg292Lys to  
157 laninamivir is similar to that of zanamivir, with 10-fold and 90-fold lower potencies, respectively.  
158 On the other hand, Arg292Lys showed much higher resistance to peramivir with a 3,169-fold  
159 increase in mean  $IC_{50}$  value, while Val116Asp exhibited a moderate 20-fold reduced sensitivity  
160 (Table 1). Interestingly, the oseltamivir-zanamivir hybrid inhibitor, MS-257 was found to be the  
161 least affected inhibitor by these mutations when compared to all four clinically used NAIs. The  
162 increase in the mean  $IC_{50}$  values of MS-257 against Arg292Lys and Val116Asp mutants were 19-  
163 fold and 7-fold, respectively.

### 164 **Val116Asp and Arg292Lys Result in Subtle N8 Active Site Changes**

165 The crystal structures of native N8, Val116Asp and Arg292Lys were determined at resolutions of  
166 1.9 Å, 1.9 Å and 1.6 Å, respectively (S2 Table). The apo structures of N8 wildtype, Val116Asp

167 and Arg292Lys showed similar overall active site arrangements, with some differences observed  
168 regarding Gln136, Thr148, Glu276 and Tyr406 (Fig 3). Specifically, the conformations of 150-  
169 loop between N8 wildtype and Val116Asp show slightly different, because of the conformational  
170 change of Thr148 and Gln136. The conformations of 430-loop between N8 wildtype and  
171 Arg292Lys display variable configurations. Moreover, the side chain of Gln136, Arg118, Tyr406  
172 and Glu276 between these two native structures exhibit different conformations. All these  
173 observed conformational differences explain why the two N8 mutants have lower affinity to the  
174 substrate compared to N8 wildtype.

### 175 **A Distinct Mechanism of Arg292Lys Drug Resistance in Group 1 N8**

176 To understand the mechanisms of N8 drug resistance, inhibitor complex structures with wildtype  
177 or mutant N8 were compared. The crystal structures of wildtype N8 complexed with zanamivir,  
178 oseltamivir, laninamivir and peramivir were determined at resolutions of 1.8 Å, 2.1 Å, 1.8 Å and  
179 2.0 Å, respectively (S3 Table). N8-Arg292Lys complexes were determined at resolutions of 1.9  
180 Å, 1.8 Å, 2.0 Å and 1.8 Å for zanamivir, oseltamivir, laninamivir and peramivir, respectively (S4  
181 Table). Binding of oseltamivir, zanamivir, peramivir and laninamivir to wildtype H10N8 NA  
182 resembles that of typical group 1 NA binding (Fig 4A, C, E and G), with differences observed  
183 regarding Tyr347 in both oseltamivir and laninamivir complex structures. In the wildtype N8  
184 complexes with zanamivir, oseltamivir and laninamivir, as well as the Arg292Lys complex with  
185 zanamivir, Tyr347 hydrogen bonds with Arg371 and the inhibitor carboxylate. In the wildtype  
186 peramivir complex, as well as the Arg292Lys complexes with laninamivir, oseltamivir and  
187 peramivir, Tyr347 points away from the active site where it can no longer interact with the  
188 inhibitor.

189 Arg292 is part of the NA tri-arginine cluster that forms strong ionic interactions with the first-  
190 generation NAI carboxylates. In the structures of N8-Arg292Lys complexed with the four NAIs,  
191 Lys292 interacts with the carboxylate group of NAIs by a bridging water molecule (Fig 4A, C, E  
192 and G). The Glu276 adopts similar conformation in N8-Arg292Lys-zanamivir and laninamivir  
193 complexes (Fig 4C and G), but slightly differ in oseltamivir and peramivir-complexes (Fig 4A and  
194 E).

195 The binding of oseltamivir to N8 (group 1 NA) and N9 (group 2 NA) was carefully compared (Fig  
196 4B, D, F and H). The flexibility of residue Glu276 is observed in the N9-Arg292Lys oseltamivir  
197 complex structure, but only a slightly shift in the N8-Arg292Lys oseltamivir complex structure.  
198 Specifically, in N8-Arg292Lys, Glu276 rotates towards Arg224 for optimal oseltamivir binding,  
199 which results in a mild shift of the oseltamivir hydrophobic group (1.11 Å). In contrast, the side  
200 chain of Glu276 in N9-Arg292Lys is oriented toward the oseltamivir carboxylate hydrophobic  
201 pentyloxy group, which is pushed 2.98 Å away from the active site. Furthermore, Arg292Lys  
202 substitution in N8 has no effect on the hydrogen bonds between Glu276 and Arg224, while, in N9,  
203 this substitution results in loss of one hydrogen bond between Glu276 and Arg224 (Fig 4B). These  
204 differences help to explain the observation that the effect of N8-Arg292Lysoseltamivir resistance  
205 is 1000-fold whereas the effect of N9-Arg292Lys resistance is 100,000-fold [10].

206 Notably, in the structure of N8-Arg292Lys-zanamivir, the orientation of Tyr347 is the same as N8  
207 wildtype, which forms hydrogen bond with the side chain of Arg371 (Fig 4C). However, the  
208 residue 347 in N9 is Aspartic acid, which side chain is not enough to form hydrogen bond with  
209 Arg371 (Fig 4D). Therefore, zanamivir shows better inhibition to N8 than N9 with Arg292Lys  
210 substitution (Table 1).

## 211 **The guanidine group of zanamivir compensates the Val116Asp resistant N8 substitution**

212 In order to understand the mechanism of Val116Asp resulting in more severe resistance to  
213 oseltamivir than zanamivir, the zanamivir and oseltamivir complex structures of N8-Val116Asp  
214 were determined at resolutions of 1.9 Å and 2.1 Å, respectively (S5 Table). The 150-loop of  
215 inhibitor bound-N8 (Val116Asp) complexes exhibited closed conformation, in which the Asp151  
216 interacts with inhibitors. When compared the oseltamivir complex-N8 wild type with that of the  
217 Val116Asp mutant, it was found that the side chain of Asp151 in N8 wildtype hydrogen bonds to  
218 C4-amino group of oseltamivir with a distance of 2.70 Å, while the corresponding distance in N8-  
219 Val116Asp was found to be 3.34 Å. In the case of zanamivir complexed structures, oxygen atom  
220 on the main chain of Asp151 makes hydrogen bond interactions with the guanidine group of  
221 zanamivir, with distance of 2.88 Å and 3.03 Å in N8 wildtype and N8-Val116Asp mutant,  
222 respectively. The hydrogen bond interactions of zanamivir guanidine group with Asp151 is less  
223 affected by the Val116Asp substitution than that of oseltamivir amino group. Moreover, Tyr347  
224 in these two Val116Asp complex structures are shifted away from both inhibitors, while Tyr347  
225 hydrogen bonds with the zanamivir and oseltamivir carboxylates groups in wildtype N8 complex  
226 structures (Fig 5). Interestingly, the oseltamivir-zanamivir hybrid inhibitor MS-257 showed better  
227 inhibition to N8-Val116Asp than oseltamivir (Table1).

## 228 **Discussion**

229 Although the crystal structures of all 9 influenza A NA subtypes have been solved to date [10, 28,  
230 30-37], the influenza A virus is constantly adapting and many new variations are being discovered,  
231 especially those with drug resistance. For example, the crystal structure analysis of Arg292Lys  
232 mutant of group 2 N9 was completed in 1998 [38], yet the corresponding group 1 N8 structure

233 reported here contains unique features which are clearly observed during oseltamivir binding.  
234 These structural differences are also reflected in the  $K_m$  values which increased 30-fold for N8-  
235 Arg292Lys and 88-fold for H7N9 N9-Arg292Lys [10], relative to the corresponding wildtype  
236 NAs.

237 The Val116Lys mutation was the most intriguing N8 substitution. It is challenging to predict a  
238 precise mechanism for NAI resistance, because the site of mutation is distal from the active site  
239 frame work. Prior to solving the crystal structures, we anticipated that the Val116Asp substitution  
240 might affect the interaction between Arg118 and the carboxylate group of the inhibitor, however  
241 contrary to expectation, the N8-Val116Lys complex structures clearly suggested that this is not  
242 the case and the loss of Tyr347-inhibitor interaction as the resistance mechanism. Tyr347 is found  
243 only in group 1 NAs which should contain the 150-loop cavity [28]. This residue was also observed  
244 to be a key factor in explaining the slightly higher NAI inhibition observed in N5 (typical group 1  
245 NA) [36] relative to pandemic 09N1 (atypical group 1 NA) [39] and 57N2 (group 2 NA) [31].  
246 Thus, we previously speculated that Tyr347 might compensate for the open 150-loop in regards to  
247 substrate binding [31].

248 Val116Lys also resulted in an altered conformation of the 150-loop residue Thr148 (Fig 3). It is  
249 possible that the further changes observed in the loop residues 146-148 upon oseltamivir binding  
250 might affect the ionic interaction of Asp151 with the oseltamivir amino group (Fig 5). Despite the  
251 moderate effect on NAI inhibition, the Val116Asp substitution also resulted in a 6-fold  $K_m$  increase  
252 relative to the wildtype (Table 1). This indicates that Val116Asp also interferes with substrate  
253 binding.

254 Zanamivir and laninamivir are more similar to the human sialic acid, *N*-acetylneuraminic acid,  
255 than oseltamivir and peramivir, and therefore should be less susceptible to drug-resistance. Of the  
256 4 clinical NAIs, zanamivir bound to both mutants in the most optimal conformation, whereas  
257 oseltamivir binding was the least optimal. Resistance of both N8 variants to zanamivir and  
258 laninamivir was also lower than that of oseltamivir and peramivir.

259 Some questions remain from the present analysis, including why peramivir was the most potent  
260 inhibitor of wildtype N8 despite lacking any Tyr347 interactions. Moreover, binding of the prodrug  
261 laninamivir octanoate (CS-8958) to N8 was distinct from group 1 09N1 and similar to group 2 N2,  
262 which indicates that NAI binding is not always group specific.

263 In summary, our current study revealed the 4-clinical available NAI resistant substitutions for N8  
264 and the underlying mechanisms have also been structurally delineated, which will help for next-  
265 generation drug development guide for drug usage in future prewarning of H10N8 AIV human  
266 infections.

## 267 **Materials and Methods**

268 **Cells, Virus and NAIs.** A549 cells were obtained from China Infrastructure of Cell Line  
269 Resources, Beijing and were grown in Dulbecco Modified Eagle's Medium (DMEM) (Gibco by  
270 Life Technologies Incorporation<sup>TM</sup>, Grand Island, New York, USA) containing 5% fetal bovine  
271 sera (FBS) (Irvine Scientific). The human influenza A/Jiangxi-Donghu/346/2013(H10N8) virus of  
272 avian origin was propagated in the allantoic cavity of 10-day-old fertilized specific-pathogen-free  
273 (SPF) hen eggs (Beijing Vital River Laboratory Animal Technology Co., Ltd.) for 96 hours at  
274 37°C. A hemagglutination assay was carried out on the harvested infected allantoic fluid in 96-  
275 well plates. After adding 25  $\mu$ L of PBS to each well, 25  $\mu$ L of virus suspension was added to the

276 first well, followed by a series of 2-fold dilutions and gentle mixing. Next, about 25  $\mu$ L of freshly  
277 prepared 1% chicken RBC was added to each well and left for 30 minutes at room temperature.  
278 Clear hemagglutination of the allantoic fluid containing the virus with chicken RBC indicates viral  
279 growth and confirms the presence of the virus. Influenza neuraminidase inhibitors oseltamivir acid  
280 (GS 4071) and zanamivir were synthesized at MedChem Express LLC, NJ, USA. MS-257 was  
281 provided by cooperator Prof. Mario Pinto.

### 282 **Isolation of H10N8 Variants with Decreased Susceptibility to Oseltamivir and Zanamivir.**

283 24-hour-old A549 cells were grown in 24 well tissue culture plates and infected with egg-grown  
284 virus at a low multiplicity of infection (MOI 0.001 PFU per cell) in maintenance medium. The  
285 virus was allowed to adsorb for only 15 minutes at 37°C, after which the inoculum was removed,  
286 and the cells were washed twice with pre-warmed PBS followed by addition of 1 ml of each drug  
287 preparation to the seeded infected cells. The plates were incubated at 37°C for 72 hours. The virus  
288 titer in each culture supernatant was determined by hemagglutination of chicken RBC. The culture  
289 supernatant that contained the minimal dose drug that still resulted in cytopathy and detectable HA  
290 titer was used as inoculum to infect new cell monolayers at a low MOI. The virus from that sample  
291 was then allowed to grow in the presence of a series of 2-fold oseltamivir and zanamivir dilutions.  
292 The virus concentrations used in the selection protocol varied, depending on the HA titer in the  
293 preceding passage and about 1 ml aliquot of viral stock culture supernatant from the preceding  
294 passage was used to infect the fresh cell monolayer cells. The HA titer was determined after each  
295 passage to estimate the amount of virus needed for infection. This selection was carried out for a  
296 total of 8 passages for both inhibitors in triplicates. Drug concentration ranged from 80  $\mu$ M to  
297 10.24 mM for oseltamivir and 20  $\mu$ M to 2.56 mM for zanamivir. All conditions were carried out  
298 in triplicates.

299 **Virus RNA Extraction and Next-Generation Sequencing (NGS).** RNA was extracted from  
300 virus isolates using a QIAamp viral RNA Mini Kit from QIAGEN, Germany (Cat. No. 52904).  
301 Complete influenza A genomes were prepared from the RNA using the Takara PrimeScript™  
302 One step RT-PCR Kit Ver. 2 (TAKARA BIO INC. Cat. #RR055A v201309Da, Japan) with slight  
303 modifications. Each RNA preparation was mixed with the enzyme mix in a 50 µL reaction system.  
304 The thermal cycle parameters were 50°C for 30 mins, 94°C for 2 mins, and then 35 cycles at 94°C  
305 for 30 secs, 58°C for 30 secs, and 72°C for 3 mins 20 secs. Primers used were 20 µM MBTuni-12  
306 (5'-ACGCGTGATCAGCAAAGCAGG) and MBTuni-13 (5'-  
307 ACGCGTGATCAGTAGAAACAAGG) that correspond to the 5' and 3' conserved sequences of  
308 all eight influenza A segments (26). NGS was used to determine the whole genomes of treated  
309 H10N8 samples. The sequencing libraries were prepared from H10N8 whole genome PCR  
310 products by end-repairing, dA-tailing, adapter ligation and PCR amplification, according to the  
311 manufacturer instructions (Life technologies). The libraries were sequenced on an Ion Proton™  
312 System, and sequencing depth was 1 G base per sample. After sequencing, raw NGS short reads  
313 were processed by filtering out low-quality reads, adaptor-contaminated reads (with >15 bp  
314 matched to the adapter sequence), poly-Ns (with 8Ns) (SOAP2 (v2.21), <5 mismatches). Clean  
315 short reads were then mapped onto the eight reference genome segments (A/Jiangxi-  
316 Donghu/346/2013(H10N8)) using TMAP (v3.4.1)  
317 (<https://github.com/iontorrent/TS/tree/master/Analysis/TMAP>) with a match rate larger than 0.90,  
318 producing the short-read-reference-genome mapping file (SRRG file), and the dominant base on  
319 each site was called to obtain the consensus genome. Consensus sequence alignments were done  
320 using MUSCLE [40] to identify the variable sites. The consensus nucleotide sites, which have  
321 changed in more than any one sample comparing with the original genome (A/Jiangxi-



322 Donghu/346/2013 (H10N8)), are designated as variable sites. Intra-host single nucleotide  
323 variations (iSNV) and their correlations were analyzed based on the SRRG file.

324 **Expression and Purification of Influenza Virus NA.** Recombinant NA protein was prepared  
325 using the established baculovirus expression system (19, 20, 22). The ectodomain (residues 81 to  
326 469 in N8 numbering) of A/JD/346/2013/H10N8 was cloned into pFastBac1 baculovirus transfer  
327 vector (Invitrogen) and the Val114Asp and Arg291Lys substitutions were constructed by site-  
328 directed mutagenesis PCR based on N8 wildtype and expressed in a baculovirus system for  
329 structural and functional analysis. A GP67 signal peptide was added at the N terminus to facilitate  
330 secretion of the recombinant protein, followed by a His tag, a tetramerizing sequence, and a  
331 thrombin cleavage site. Recombinant pFastBac1 plasmid was used to transform DH<sub>10</sub>Bac™  
332 *Escherichia coli* (Invitrogen). The recombinant baculovirus was obtained following the  
333 manufacturer's protocol, and Hi5 cell suspension cultures were infected with high-titer  
334 recombinant baculovirus. After growth of the infected Hi5 suspension cultures for 2 days,  
335 centrifuged media were applied to a 5-mL HisTrap FF column (GE Healthcare), which was washed  
336 with 20 mM imidazole. The NA was thereafter eluted using 300 mM imidazole. After dialysis and  
337 thrombin digestion (3 U/mg NA; BD Biosciences) overnight at 4°C, gel filtration chromatography  
338 was performed with a Superdex® 200 10/300 GL column (GE Healthcare) using 20 mM Tris-HCl  
339 and 50 mM NaCl (pH 8.0) buffer or PBS buffer for crystallization or functional assay, respectively.  
340 Pure NA fractions were selected and further concentrated using a 10 kDa (Millipore) membrane  
341 concentrator.

342 **Crystallization, Drug-Soaking and Crystal Structure Determination.** wildtype and mutant N8  
343 crystals were obtained using the sitting-drop vapor diffusion method. The NA proteins [1 μL  
344 of 10mg/mL protein in 20mM Tris and 50mM NaCl (pH 8.0)] were mixed with 1 μL of reservoir

345 solution. N8 wildtype crystals were obtained in the condition of 0.1 M sodium acetate trihydrate  
346 pH 4.7 and 5% w/v Polyethylene glycol 10,000. N8-Val116Asp crystals were obtained in the  
347 condition of 0.1M DL-malic acid pH 7.0 and 12% Polyethylene glycol 3,350. N8-Arg292Lys  
348 crystals were obtained in the condition of 0.1 M potassium phosphate monobasic/sodium  
349 phosphate dibasic pH 6.2 and 10% Polyethylene glycol, 3,000.

350 All NA crystals were cryoprotected in mother liquor with the addition of 20% (vol/vol) glycerol  
351 before being flash-cooled at 100 K for obtaining apo structures. The crystals were then incubated  
352 in the mother liquor containing 20 mM inhibitors (oseltamivir acid, zanamivir, peramivir, and  
353 laninamivir) and then flash-cooled at 100 K.

354 Diffraction data were collected at Shanghai Synchrotron Radiation Facility beamline BL17U. The  
355 collected intensities were indexed, integrated, corrected for absorption, and scaled and merged  
356 using HKL-2000 (27). The structure of N8 was solved by molecular replacement using Phaser (28)  
357 from the CCP4 program suite (29), with the structure of N8 (PDB ID code 2HT7) as a search  
358 model. N8-Val116Asp and Arg292Lys were equally solved using the native N8 as the search  
359 model. The initial model was refined by rigid body refinement using REFMAC5 (30), and  
360 extensive model building was performed using COOT (31). Further rounds of refinement were  
361 performed using the phenix.refine program implemented in the PHENIX package (32) with energy  
362 minimization, isotropic ADP refinement and bulk solvent modeling. The stereochemical quality  
363 of the final model was assessed with PROCHECK (33). Structures were aligned and analyzed  
364 using PyMOL.

365 **Fluorescent NA Activity Assay.** A 4-methylumbelliferyl-Neu5ac-(MUNANA)-based  
366 fluorometric NA assay (34) was used for measuring the NA activity and inhibition. The

367 appropriate protein concentrations were chosen after several rounds of preliminary tests. The km  
368 values for the active NAs were determined by mixing 10  $\mu$ L of each recombinant protein with 10  
369  $\mu$ L of buffer MES-CaCl<sub>2</sub> buffer (pH 6.0) in each 96-well plate and serial dilutions (9.76  $\mu$ M –  
370 5mM) of MUNANA (30  $\mu$ L) were added to each well. The fluorescence intensity of the released  
371 product was measured every 30 seconds for 1 hour at 37°C on the SpectraMax M5 (Molecular  
372 Devices), with excitation and emission wavelengths of 355 nm and 460 nm, respectively. For  
373 inhibition assays, 10  $\mu$ L of recombinant protein was mixed with 10  $\mu$ L of PBS or inhibitor in 96-  
374 well standard opaque plate and 30  $\mu$ L of 167  $\mu$ M MUNANA (Sigma, USA) in 33 mM MES and 4  
375 mM CaCl<sub>2</sub> (pH 6.0) for a final substrate concentration of 100  $\mu$ M. The inhibitors (in different  
376 concentrations) were pre-incubated with the NA protein for 30 minutes at 37°C before adding  
377 MUNANA, and then loaded on the SpectraMax<sup>®</sup> M5 Molecular devices. Fluorescence was  
378 monitored immediately after substrate addition at 1-minute intervals for 30 minutes. All assays  
379 were performed in triplicates and IC<sub>50</sub> values for each inhibitor were calculated with Graphpad  
380 Prism 5.0 as the concentration of inhibitor resulting in a 50% reduction in fluorescence units (FU)  
381 compared with the control.

## 382 **References**

- 383 1. He G, Massarella J, Ward P. Clinical pharmacokinetics of the prodrug oseltamivir and its  
384 active metabolite Ro 64-0802. *Clin Pharmacokinet.* 1999;37(6):471-84. Epub 2000/01/11.  
385 doi: 10.2165/00003088-199937060-00003. PubMed PMID: 10628898.
- 386 2. Greengard O, Poltoratskaia N, Leikina E, Zimmerberg J, Moscona A. The anti-influenza  
387 virus agent 4-GU-DANA (zanamivir) inhibits cell fusion mediated by human parainfluenza  
388 virus and influenza virus HA. *J Virol.* 2000;74(23):11108-14. Epub 2000/11/09. PubMed  
389 PMID: 11070006; PubMed Central PMCID: PMC113191.
- 390 3. Birnkrant D, Cox E. The Emergency Use Authorization of peramivir for treatment of 2009  
391 H1N1 influenza. *N Engl J Med.* 2009;361(23):2204-7. Epub 2009/11/04. doi:  
392 10.1056/NEJMp0910479. PubMed PMID: 19884645.
- 393 4. Kubo S, Tomozawa T, Kakuta M, Tokumitsu A, Yamashita M. Laninamivir prodrug CS-  
394 8958, a long-acting neuraminidase inhibitor, shows superior anti-influenza virus activity  
395 after a single administration. *Antimicrob Agents Chemother.* 2010;54(3):1256-64. Epub

- 396 2010/01/06. doi: 10.1128/AAC.01311-09. PubMed PMID: 20047917; PubMed Central  
397 PMCID: PMCPMC2825999.
- 398 5. Davies BE. Pharmacokinetics of oseltamivir: an oral antiviral for the treatment and  
399 prophylaxis of influenza in diverse populations. *J Antimicrob Chemother.* 2010;65 Suppl  
400 2:ii5-ii10. Epub 2010/03/20. doi: 10.1093/jac/dkq015. PubMed PMID: 20215135; PubMed  
401 Central PMCID: PMCPMC2835511.
- 402 6. Hurt AC, Holien JK, Parker M, Kelso A, Barr IG. Zanamivir-resistant influenza viruses  
403 with a novel neuraminidase mutation. *J Virol.* 2009;83(20):10366-73. Epub 2009/07/31.  
404 doi: 10.1128/JVI.01200-09. PubMed PMID: 19641000; PubMed Central PMCID:  
405 PMCPMC2753113.
- 406 7. Eshaghi A, Patel SN, Sarabia A, Higgins RR, Savchenko A, Stojios PJ, et al. Multidrug-  
407 resistant pandemic (H1N1) 2009 infection in immunocompetent child. *Emerg Infect Dis.*  
408 2011;17(8):1472-4. Epub 2011/08/02. doi: 10.3201/eid1708.102004. PubMed PMID:  
409 21801626; PubMed Central PMCID: PMCPMC3381550.
- 410 8. Sheu TG, Deyde VM, Okomo-Adhiambo M, Garten RJ, Xu X, Bright RA, et al.  
411 Surveillance for neuraminidase inhibitor resistance among human influenza A and B  
412 viruses circulating worldwide from 2004 to 2008. *Antimicrob Agents Chemother.*  
413 2008;52(9):3284-92. Epub 2008/07/16. doi: 10.1128/AAC.00555-08. PubMed PMID:  
414 18625765; PubMed Central PMCID: PMCPMC2533500.
- 415 9. Yen HL, Hoffmann E, Taylor G, Scholtissek C, Monto AS, Webster RG, et al. Importance  
416 of neuraminidase active-site residues to the neuraminidase inhibitor resistance of influenza  
417 viruses. *J Virol.* 2006;80(17):8787-95. Epub 2006/08/17. doi: 10.1128/JVI.00477-06.  
418 PubMed PMID: 16912325; PubMed Central PMCID: PMCPMC1563878.
- 419 10. Wu Y, Bi Y, Vavricka CJ, Sun X, Zhang Y, Gao F, et al. Characterization of two distinct  
420 neuraminidases from avian-origin human-infecting H7N9 influenza viruses. *Cell Res.*  
421 2013;23(12):1347-55. doi: 10.1038/cr.2013.144. PubMed PMID: 24165891; PubMed  
422 Central PMCID: PMC3847574.
- 423 11. Kobasa D, Wells K, Kawaoka Y. Amino acids responsible for the absolute sialidase  
424 activity of the influenza A virus neuraminidase: relationship to growth in the duck intestine.  
425 *J Virol.* 2001;75(23):11773-80. Epub 2001/11/02. doi: 10.1128/JVI.75.23.11773-  
426 11780.2001. PubMed PMID: 11689658; PubMed Central PMCID: PMCPMC114763.
- 427 12. Aoki FY, Boivin G, Roberts N. Influenza virus susceptibility and resistance to oseltamivir.  
428 *Antivir Ther.* 2007;12(4 Pt B):603-16. Epub 2007/10/20. PubMed PMID: 17944268.
- 429 13. McKimm-Breschkin JL, Williams J, Barrett S, Jachno K, McDonald M, Mohr PG, et al.  
430 Reduced susceptibility to all neuraminidase inhibitors of influenza H1N1 viruses with  
431 haemagglutinin mutations and mutations in non-conserved residues of the neuraminidase.  
432 *J Antimicrob Chemother.* 2013;68(10):2210-21. Epub 2013/06/14. doi:  
433 10.1093/jac/dkt205. PubMed PMID: 23759505; PubMed Central PMCID:  
434 PMCPMC3772742.
- 435 14. Hurt AC, Leang SK, Speers DJ, Barr IG, Maurer-Stroh S. Mutations I117V and I117M and  
436 oseltamivir sensitivity of pandemic (H1N1) 2009 viruses. *Emerg Infect Dis.*  
437 2012;18(1):109-12. doi: 10.3201/eid1801.111079. PubMed PMID: 22260817; PubMed  
438 Central PMCID: PMC3310118.
- 439 15. Ilyushina NA, Seiler JP, Rehg JE, Webster RG, Govorkova EA. Effect of neuraminidase  
440 inhibitor-resistant mutations on pathogenicity of clade 2.2 A/Turkey/15/06 (H5N1)  
441 influenza virus in ferrets. *PLoS Pathog.* 2010;6(5):e1000933. Epub 2010/06/05. doi:

- 442 10.1371/journal.ppat.1000933. PubMed PMID: 20523902; PubMed Central PMCID:  
443 PMC2877746.
- 444 16. Kaminski MM, Ohnemus A, Staeheli P, Rubbenstroth D. Pandemic 2009 H1N1 influenza  
445 A virus carrying a Q136K mutation in the neuraminidase gene is resistant to zanamivir but  
446 exhibits reduced fitness in the guinea pig transmission model. *J Virol.* 2013;87(3):1912-5.  
447 Epub 2012/11/30. doi: 10.1128/JVI.02507-12. PubMed PMID: 23192869; PubMed  
448 Central PMCID: PMCPMC3554154.
- 449 17. Dapat C, Suzuki Y, Saito R, Kyaw Y, Myint YY, Lin N, et al. Rare influenza A (H3N2)  
450 variants with reduced sensitivity to antiviral drugs. *Emerg Infect Dis.* 2010;16(3):493-6.  
451 Epub 2010/03/06. doi: 10.3201/eid1603.091321. PubMed PMID: 20202427; PubMed  
452 Central PMCID: PMCPMC3322031.
- 453 18. Hurt AC, Selleck P, Komadina N, Shaw R, Brown L, Barr IG. Susceptibility of highly  
454 pathogenic A(H5N1) avian influenza viruses to the neuraminidase inhibitors and  
455 adamantanes. *Antiviral Res.* 2007;73(3):228-31. Epub 2006/11/23. doi:  
456 10.1016/j.antiviral.2006.10.004. PubMed PMID: 17112602.
- 457 19. McKimm-Breschkin J, Trivedi T, Hampson A, Hay A, Klimov A, Tashiro M, et al.  
458 Neuraminidase sequence analysis and susceptibilities of influenza virus clinical isolates to  
459 zanamivir and oseltamivir. *Antimicrob Agents Chemother.* 2003;47(7):2264-72. Epub  
460 2003/06/25. PubMed PMID: 12821478; PubMed Central PMCID: PMCPMC161875.
- 461 20. Wei SH, Yang JR, Wu HS, Chang MC, Lin JS, Lin CY, et al. Human infection with avian  
462 influenza A H6N1 virus: an epidemiological analysis. *The Lancet Respiratory medicine.*  
463 2013;1(10):771-8. Epub 2014/01/28. doi: 10.1016/S2213-2600(13)70221-2. PubMed  
464 PMID: 24461756.
- 465 21. Wang X, Jiang H, Wu P, Uyeki TM, Feng L, Lai S, et al. Epidemiology of avian influenza  
466 A H7N9 virus in human beings across five epidemics in mainland China, 2013-17: an  
467 epidemiological study of laboratory-confirmed case series. *Lancet Infect Dis.*  
468 2017;17(8):822-32. Epub 2017/06/07. doi: 10.1016/S1473-3099(17)30323-7. PubMed  
469 PMID: 28583578.
- 470 22. Gao R, Cao B, Hu Y, Feng Z, Wang D, Hu W, et al. Human infection with a novel avian-  
471 origin influenza A (H7N9) virus. *N Engl J Med.* 2013;368(20):1888-97. Epub 2013/04/13.  
472 doi: 10.1056/NEJMoa1304459. PubMed PMID: 23577628.
- 473 23. Yang ZF, Mok CK, Peiris JS, Zhong NS. Human Infection with a Novel Avian Influenza  
474 A(H5N6) Virus. *N Engl J Med.* 2015;373(5):487-9. Epub 2015/07/30. doi:  
475 10.1056/NEJMc1502983. PubMed PMID: 26222578.
- 476 24. Zhang T, Bi Y, Tian H, Li X, Liu D, Wu Y, et al. Human infection with influenza virus  
477 A(H10N8) from live poultry markets, China, 2014. *Emerg Infect Dis.* 2014;20(12):2076-  
478 9. Epub 2014/11/27. doi: 10.3201/eid2012.140911. PubMed PMID: 25425075; PubMed  
479 Central PMCID: PMCPMC4257803.
- 480 25. Gao GF. Influenza and the live poultry trade. *Science.* 2014;344(6181):235. Epub  
481 2014/04/20. doi: 10.1126/science.1254664. PubMed PMID: 24744345.
- 482 26. Wan J, Zhang J, Tao W, Jiang G, Zhou W, Pan J, et al. [A report of first fatal case of  
483 H10N8 avian influenza virus pneumonia in the world]. *Zhonghua Wei Zhong Bing Ji Jiu*  
484 *Yi Xue.* 2014;26(2):120-2. Epub 2014/02/15. doi: 10.3760/cma.j.issn.2095-  
485 4352.2014.02.013. PubMed PMID: 24524404.
- 486 27. Chen H, Yuan H, Gao R, Zhang J, Wang D, Xiong Y, et al. Clinical and epidemiological  
487 characteristics of a fatal case of avian influenza A H10N8 virus infection: a descriptive

- 488 study. *Lancet*. 2014;383(9918):714-21. Epub 2014/02/11. doi: 10.1016/S0140-  
489 6736(14)60111-2. PubMed PMID: 24507376.
- 490 28. Russell RJ, Haire LF, Stevens DJ, Collins PJ, Lin YP, Blackburn GM, et al. The structure  
491 of H5N1 avian influenza neuraminidase suggests new opportunities for drug design.  
492 *Nature*. 2006;443(7107):45-9. Epub 2006/08/18. doi: 10.1038/nature05114. PubMed  
493 PMID: 16915235.
- 494 29. Xu X, Zhu X, Dwek RA, Stevens J, Wilson IA. Structural characterization of the 1918  
495 influenza virus H1N1 neuraminidase. *J Virol*. 2008;82(21):10493-501. Epub 2008/08/22.  
496 doi: 10.1128/JVI.00959-08. PubMed PMID: 18715929; PubMed Central PMCID:  
497 PMCPMC2573172.
- 498 30. Li Q, Qi J, Zhang W, Vavricka CJ, Shi Y, Wei J, et al. The 2009 pandemic H1N1  
499 neuraminidase N1 lacks the 150-cavity in its active site. *Nat Struct Mol Biol*.  
500 2010;17(10):1266-8. Epub 2010/09/21. doi: nsmb.1909 [pii]. PubMed PMID: 20852645.
- 501 31. Vavricka CJ, Li Q, Wu Y, Qi J, Wang M, Liu Y, et al. Structural and functional analysis  
502 of laninamivir and its octanoate prodrug reveals group specific mechanisms for influenza  
503 NA inhibition. *PLoS Pathog*. 2011;7(10):e1002249. Epub 2011/10/27. doi:  
504 10.1371/journal.ppat.1002249 PPATHOGENS-D-11-00921 [pii]. PubMed PMID:  
505 22028647; PubMed Central PMCID: PMC3197600.
- 506 32. Sun X, Li Q, Wu Y, Wang M, Liu Y, Qi J, et al. Structure of influenza virus N7: the last  
507 piece of the neuraminidase "jigsaw" puzzle. *J Virol*. 2014;88(16):9197-207. doi:  
508 10.1128/JVI.00805-14. PubMed PMID: 24899180; PubMed Central PMCID:  
509 PMC4136277.
- 510 33. Wu Y, Qin G, Gao F, Liu Y, Vavricka CJ, Qi J, et al. Induced opening of influenza virus  
511 neuraminidase N2 150-loop suggests an important role in inhibitor binding. *Sci Rep*.  
512 2013;3:1551. doi: 10.1038/srep01551. PubMed PMID: 23531861; PubMed Central  
513 PMCID: PMC3609017.
- 514 34. Li Q, Qi J, Wu Y, Kiyota H, Tanaka K, Suhara Y, et al. Functional and structural analysis  
515 of influenza virus neuraminidase n3 offers further insight into the mechanisms of  
516 oseltamivir resistance. *J Virol*. 2013;87(18):10016-24. doi: 10.1128/JVI.01129-13.  
517 PubMed PMID: 23824808; PubMed Central PMCID: PMC3753999.
- 518 35. Vavricka CJ, Liu Y, Li Q, Shi Y, Wu Y, Sun YP, et al. Special features of the 2009  
519 pandemic swine-origin influenza A H1N1 hemagglutinin and neuraminidase. *Chinese Sci*  
520 *Bull*. 2011;56(17):1747-52. PubMed PMID: ISI:000291259300001.
- 521 36. Wang M, Qi J, Liu Y, Vavricka CJ, Wu Y, Li Q, et al. Influenza A virus N5 neuraminidase  
522 has an extended 150-cavity. *J Virol*. 2011;85(16):8431-5. Epub 2011/06/10. doi:  
523 JVI.00638-11 [pii]. PubMed PMID: 21653672; PubMed Central PMCID: PMC3147963.
- 524 37. Wu Y, Wu Y, Tefsen B, Shi Y, Gao GF. Bat-derived influenza-like viruses H17N10 and  
525 H18N11. *Trends in microbiology*. 2014;22(4):183-91. Epub 2014/03/04. doi:  
526 10.1016/j.tim.2014.01.010. PubMed PMID: 24582528.
- 527 38. Varghese JN, Smith PW, Sollis SL, Blick TJ, Sahasrabudhe A, McKimm-Breschkin JL, et  
528 al. Drug design against a shifting target: a structural basis for resistance to inhibitors in a  
529 variant of influenza virus neuraminidase. *Structure*. 1998;6(6):735-46. Epub 1998/07/10.  
530 PubMed PMID: 9655825.

- 531 39. Wu Y, Vavricka CJ, Wu Y, Li Q, Rudrawar S, Thomson RJ, et al. Atypical group 1  
532 neuraminidase pH1N1-N1 bound to a group 1 inhibitor. *Protein Cell*. 2015;6(10):771-3.  
533 Epub 2015/09/04. doi: 10.1007/s13238-015-0197-6. PubMed PMID: 26334400; PubMed  
534 Central PMCID: PMC4598326.
- 535 40. Edgar RC. MUSCLE: a multiple sequence alignment method with reduced time and space  
536 complexity. *BMC Bioinformatics*. 2004;5:113. Epub 2004/08/21. doi: 10.1186/1471-  
537 2105-5-113. PubMed PMID: 15318951; PubMed Central PMCID: PMC4598326.

538

### 539 **Supporting Information Legends**

540 **Table 1.**  $K_m$  and  $IC_{50}$  values for N8 wildtype and mutant proteins. The  $IC_{50}$  values and 95%  
541 confidence intervals (CIs) are provided.

542 **S1 Fig.** Consensus sequence variations of H10N8 virus under drug treatment. The first row  
543 represents the structural proteins of H10N8 and vertical numbers represent different amino acid  
544 sites. The consensus amino sites list default amino acids, dots represent no substitutions and  
545 question marks represents unknown amino acids due to sites that were not covered by short reads.  
546 Osel: oseltamivir, Zan: zanamivir, and the numeral to the right of Osel and Zan are the passage  
547 numbers.

548 **S1 Table.** Inhibitor concentration and HA titer of passaged viruses. The inhibitor concentration  
549 and HA titer for eight passages are listed in the table. “-” means no hemagglutination.

550 **S2 Table.** Crystallographic data collection and refinement statistics of native N8 and N8  
551 mutations.

552 **S3 Table.** Crystallographic data collection and refinement statistics of N8-inhibitor complexes.

553 **S4 Table.** Crystallographic data collection and refinement statistics of N8-Arg292Lys-inhibitor  
554 complexes.

555 **S5 Table.** Crystallographic data collection and refinement statistics of N8-Val116Asp–inhibitor  
556 complexes

557

## 558 **Figure Legends**

559 **Fig 1. Substitution frequency of Val116Asp and Arg292Lys in N8 under NAI pressure.** (A)

560 Mutation frequency of Arg292Lys increased sharply and throughout the passage period during  
561 oseltamivir treatment. (B) A similar trend was observed for Val116Asp during zanamivir  
562 treatment, although there was a reduction in the mutation rate at passages 5 and 7.

563 **Fig 2. Heatmap and correlation network of oseltamivir treated samples.** (A) Heatmap of

564 amino acid residues under oseltamivir treatment from the 1st to 7th passage. (B) Heatmap of amino

565 acid residues under zanamivir treatment from the 1<sup>st</sup> to 7<sup>th</sup> passage. The values in each cell

566 represent the substitution frequencies. A sudden change in the default frequency will lead to a

567 change in the amino acid site. The ratio of the depth sequencing site or threshold of total depth is

568 10. Mutation frequency is based on color change. Each column represents the amino acid sites

569 separated by “-” while each row represents the drug passage including positive control. POS:

570 positive control, N/A: not available data to give a decisive result, OS: oseltamivir, Zan: zanamivir,

571 and the numerals next to each inhibitor represent the passage numbers. (C) Correlation networks

572 of different amino acid sites. (D) Correlation networks of different amino acid sites show a positive

573 correlation between NA Asp116 and NA Arg292. To avoid error, smooth changing sites were used

574 for correlation analysis which could be judged easily from the heatmap. Amino acid sites are

575 indicated as different colors depending on the encoded protein. 2 or more amino acids connected

576 together indicates a correlation larger than 0.8 ( $r > 0.8$ ). Correlations were determined using

577 Pearson's rank correlation method. P-values of all correlations are less than 0.05. Positive



578 correlation is indicated by a red line connecting amino acids while negative correlation is indicated  
579 by a green line.

580 **Fig 3. Active site comparison of N8 wildtype (green), Val116Asp (cyan) and Arg292Lys**  
581 **(magenta).** (A) The comparison of the key residues conformation between N8 wildtype and N8-  
582 Val116Asp. (B) Comparison of the key residues in the active site between N8 wildtype and N8-  
583 Arg292Lys. Key residues are labeled in sticks.

584 **Fig 4. Comparison of wildtype N8, N8-Arg292Lys and N9Arg292Lys binding to four NAIs.**  
585 (A and B) oseltamivir; (C and D) zanamivir; (E and F) peramivir and (G and H) laninamivir. All  
586 the inhibitors and the key residues are displayed in sticks. The hydrogen bonds are indicated in  
587 dash. The PDB code of N9-Arg292Lys-oseltamivir, N9-Arg292Lys-zanamivir, N9-Arg292Lys-  
588 peramivir and N9-Arg292Lys-laninamivir are 4MWW, 4MWX, 4MX0 and 4MWY, respectively.

589 **Fig 5. Comparison of the binding mode between N8 wildtype and N8-Val116Asp with two**  
590 **inhibitors.** (A) The binding mode of N8 wildtype-oseltamivir (cyan) and N8-Val116Asp-  
591 zanamivir (salmon). (B) The binding mode of N8 wildtype-zanamivir (bright yellow) and N8-  
592 Val116Asp-zanamivir (orange).

593

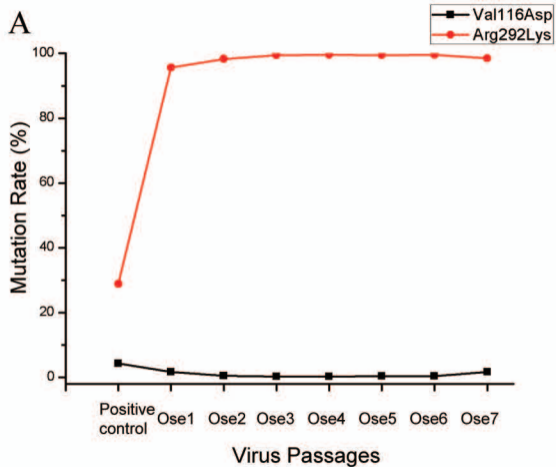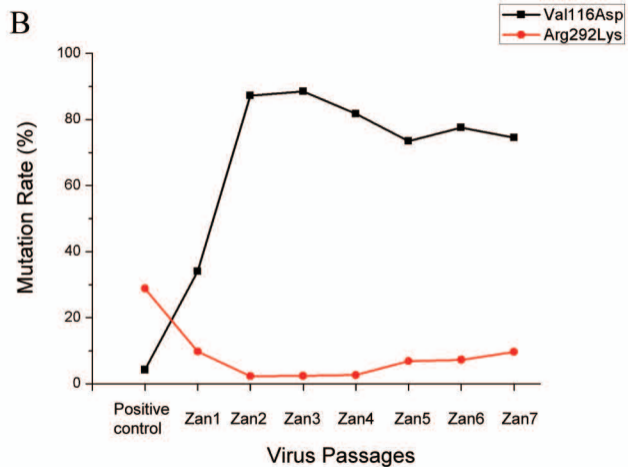

A

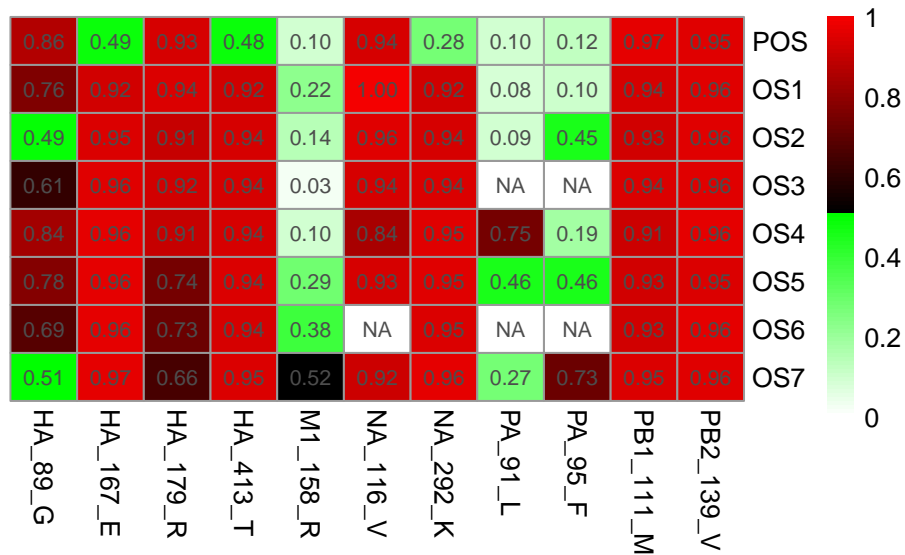

B

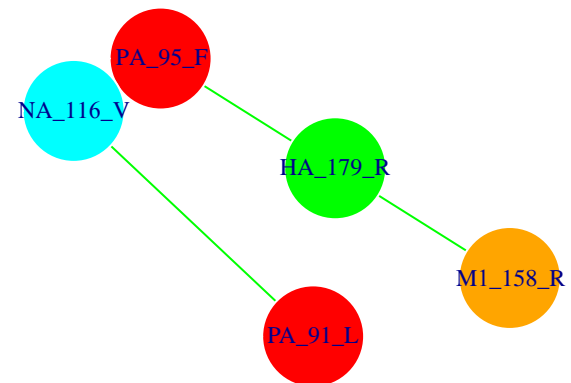

C

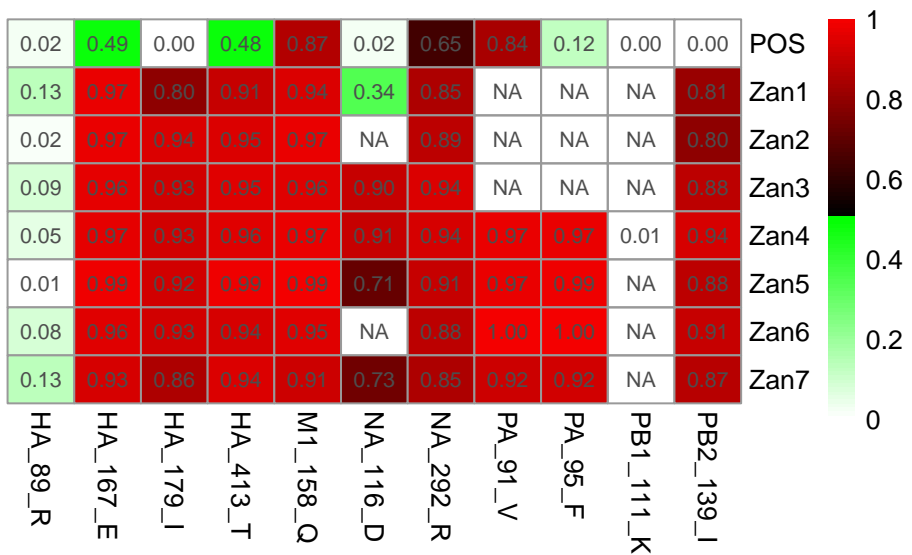

D

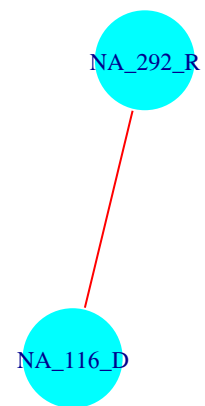

A

- N8 wild type
- N8 Val116Asp

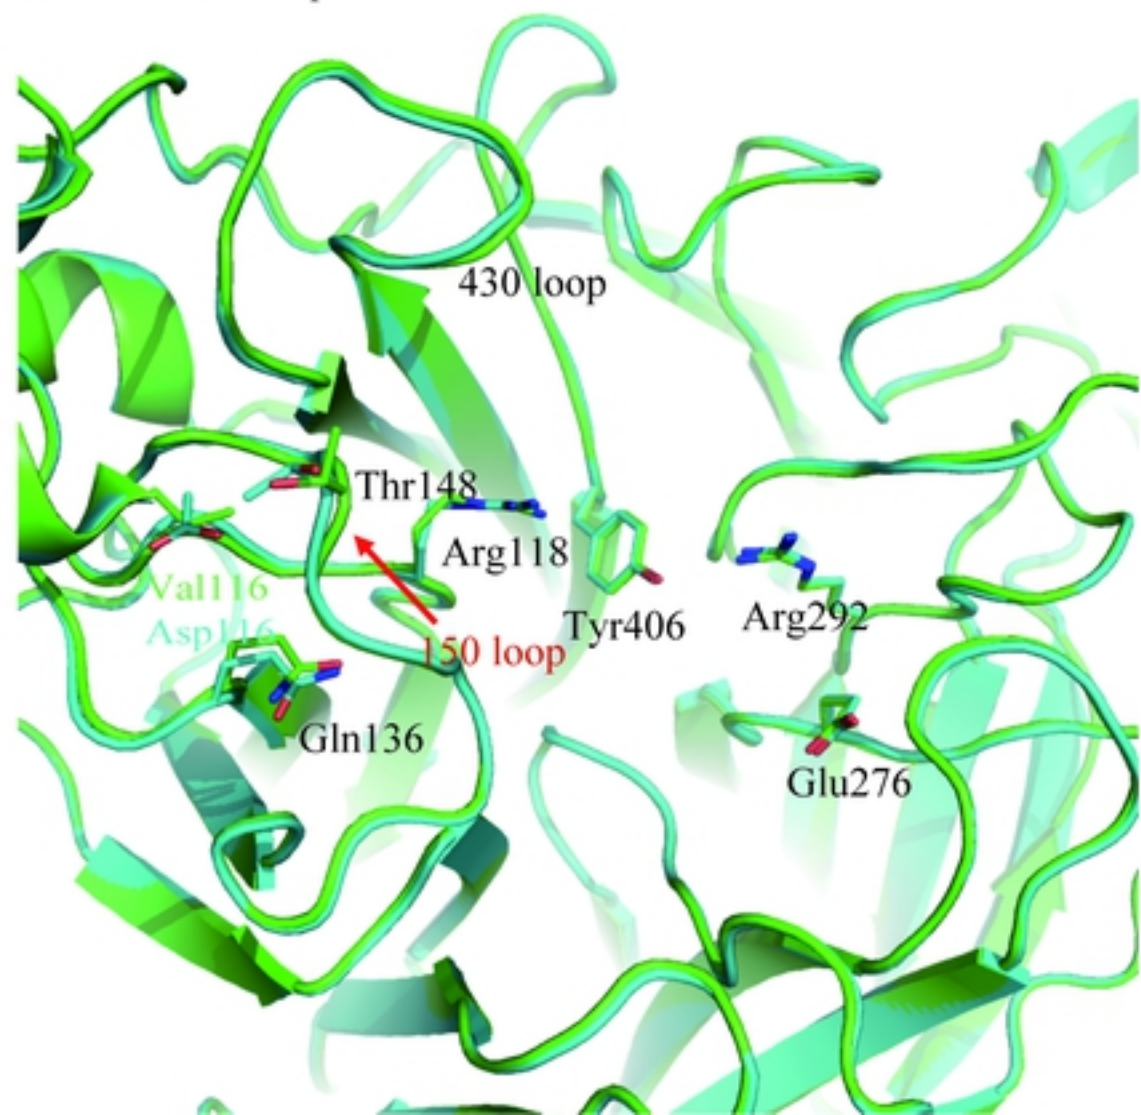

B

- N8 wild type
- N8 Arg292Lys

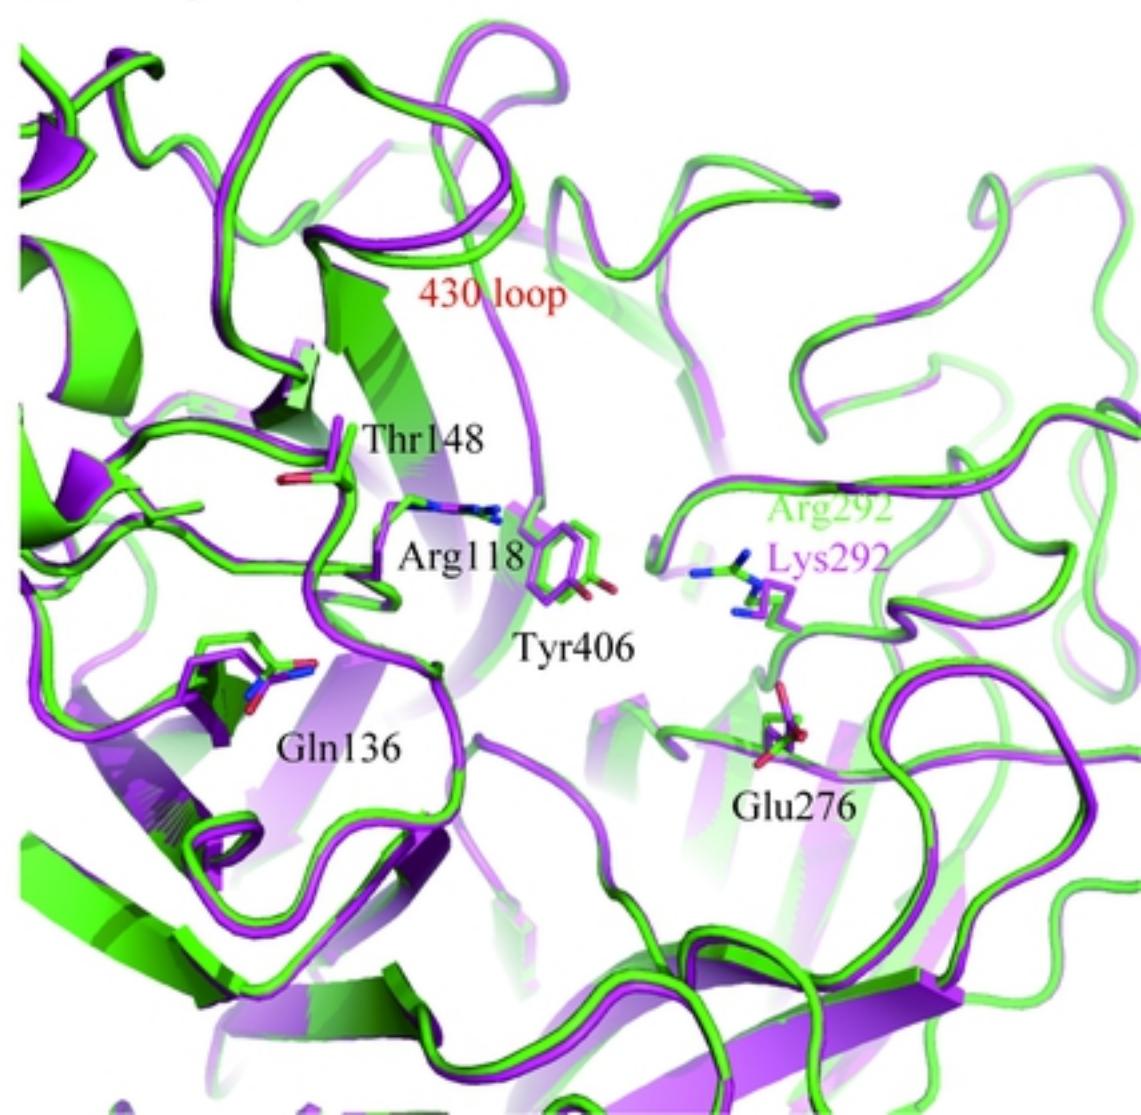

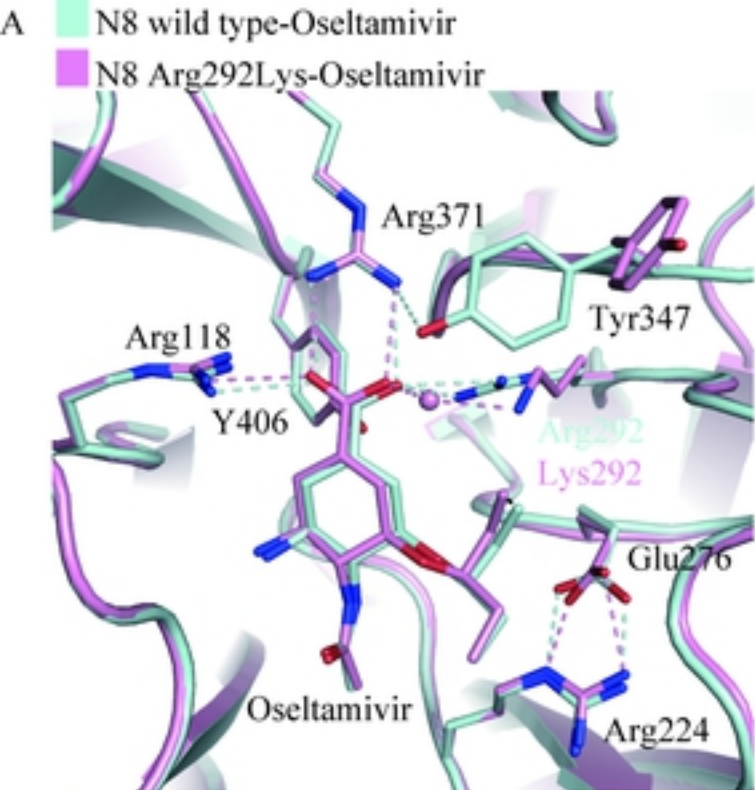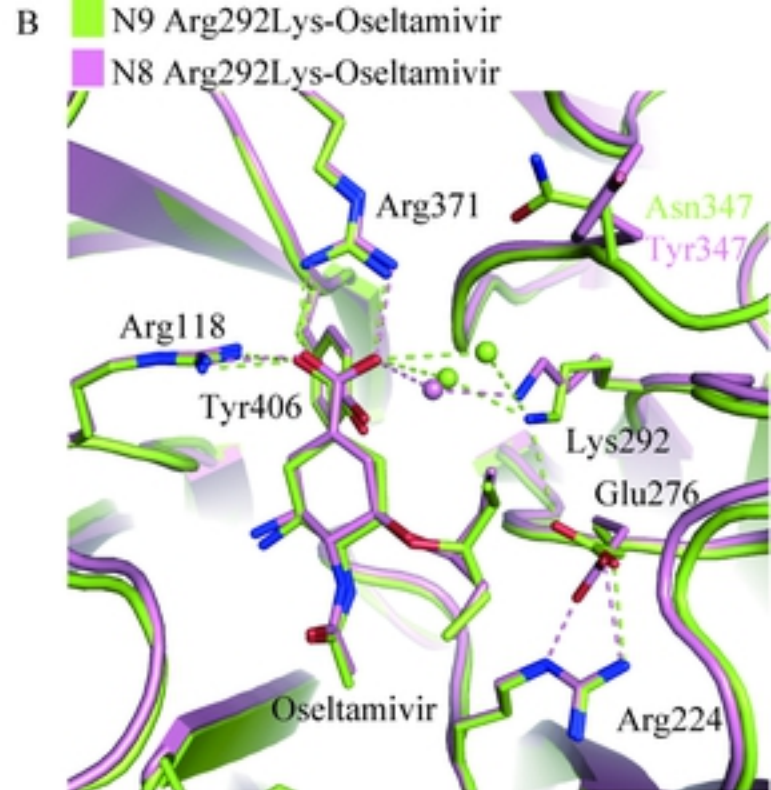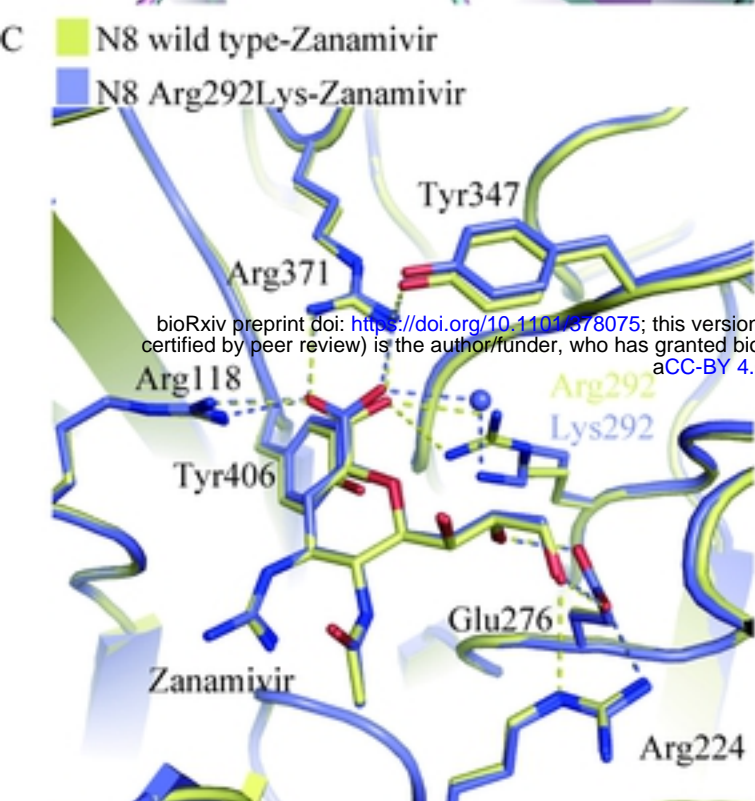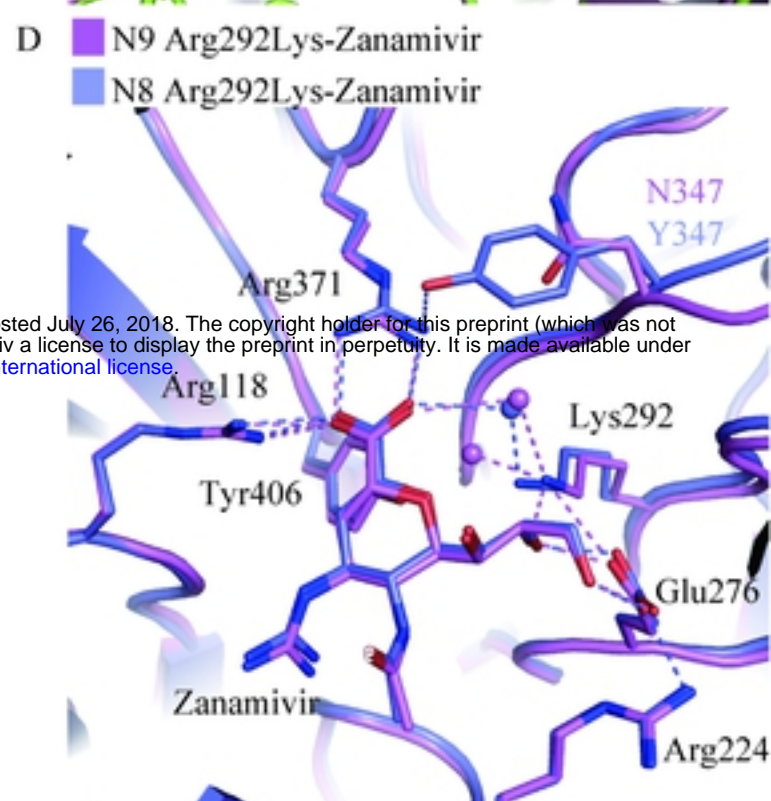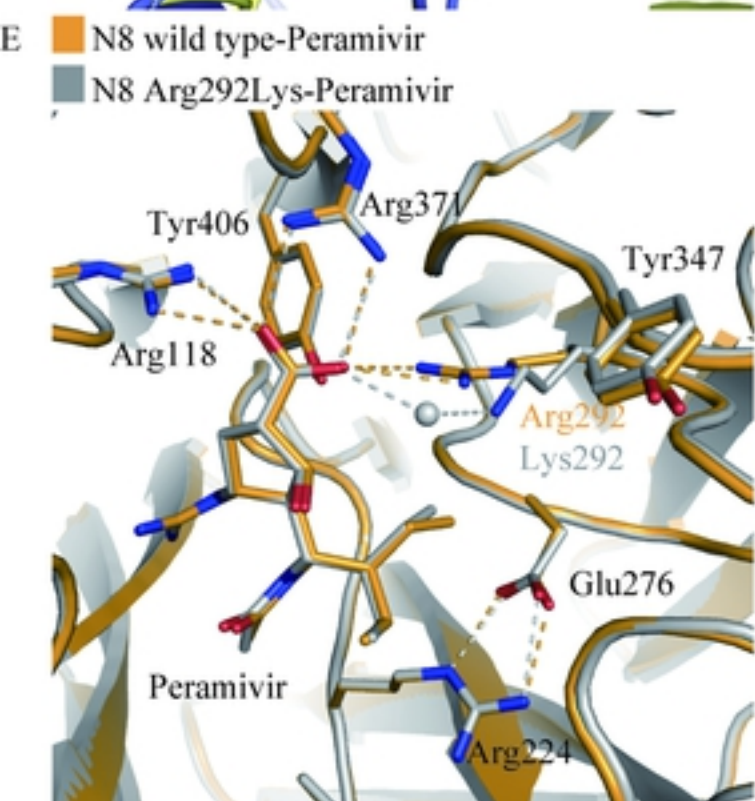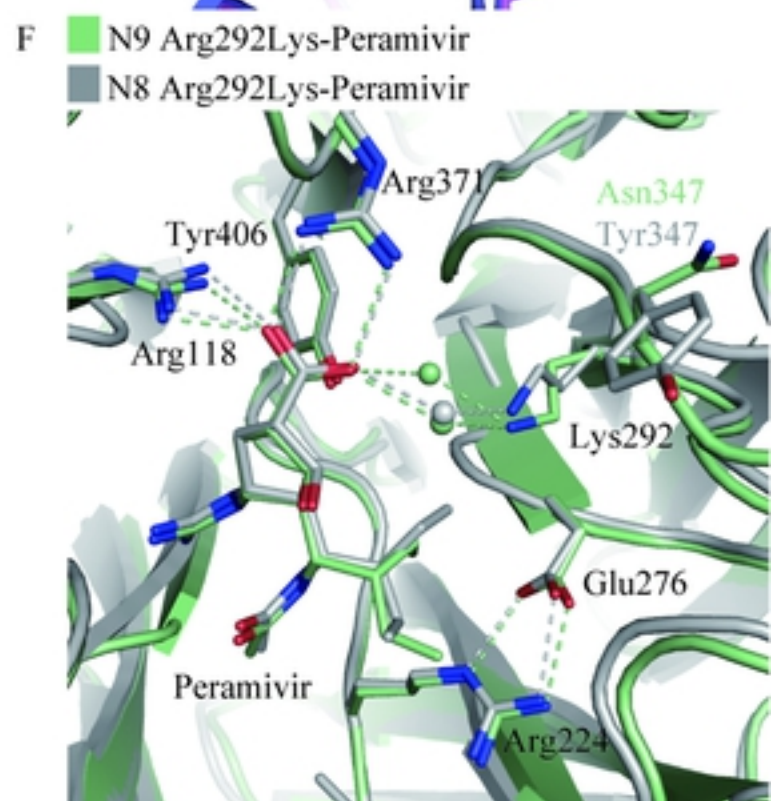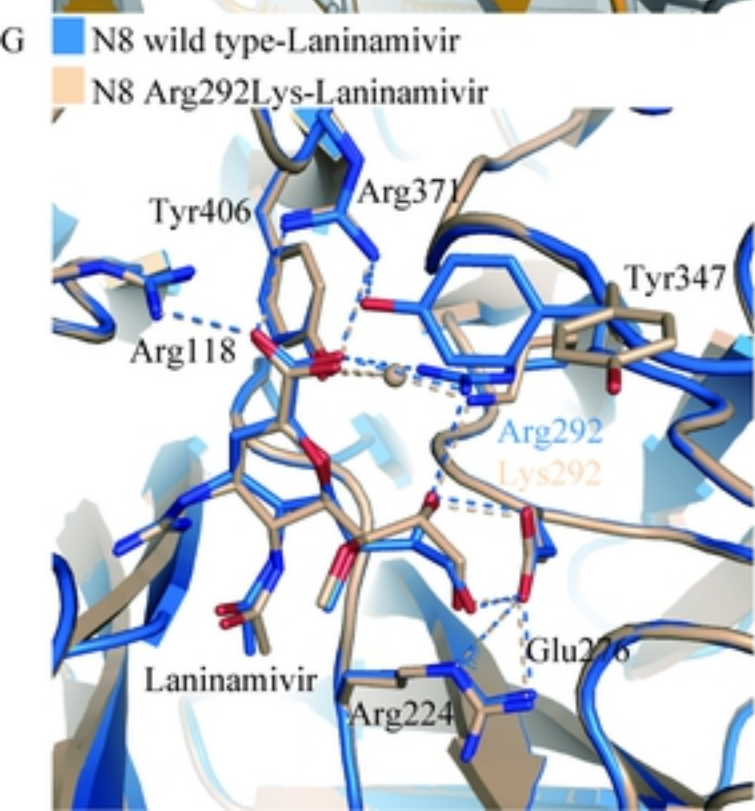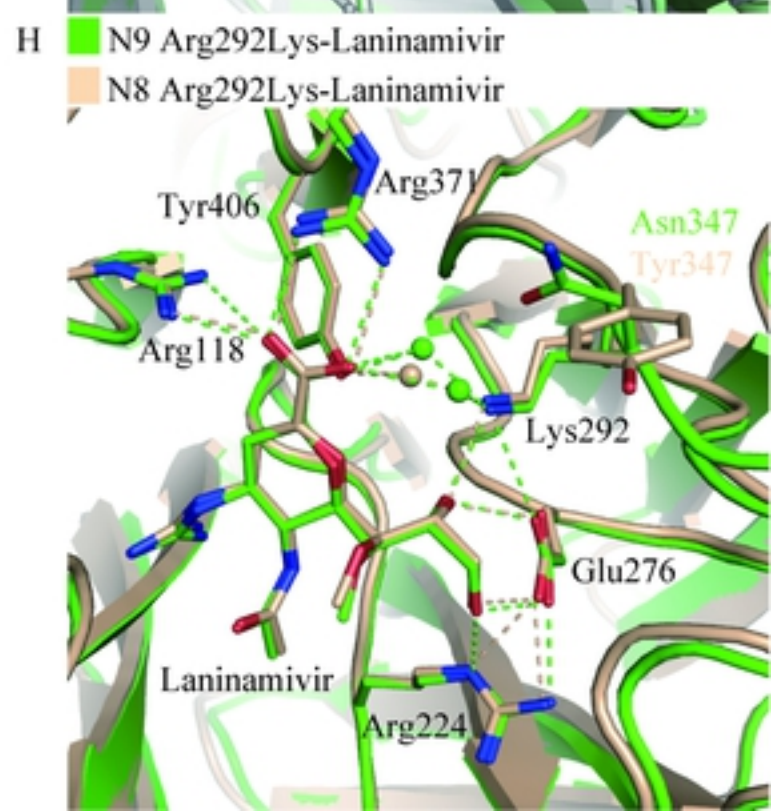

bioRxiv preprint doi: <https://doi.org/10.1101/378075>; this version posted July 26, 2018. The copyright holder for this preprint (which was not certified by peer review) is the author/funder, who has granted bioRxiv a license to display the preprint in perpetuity. It is made available under aCC-BY 4.0 International license.

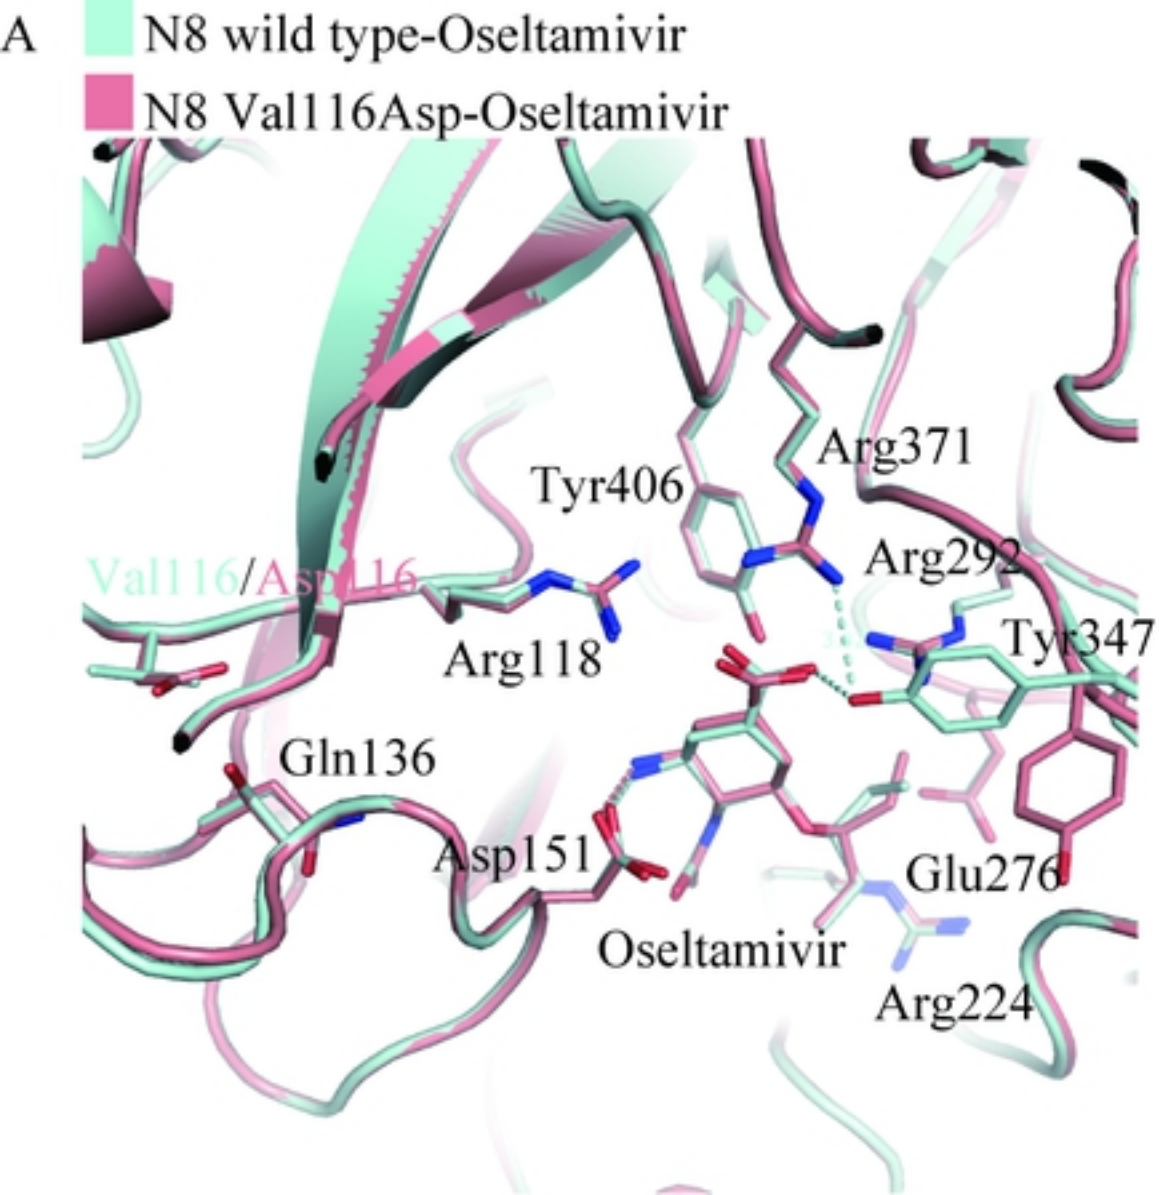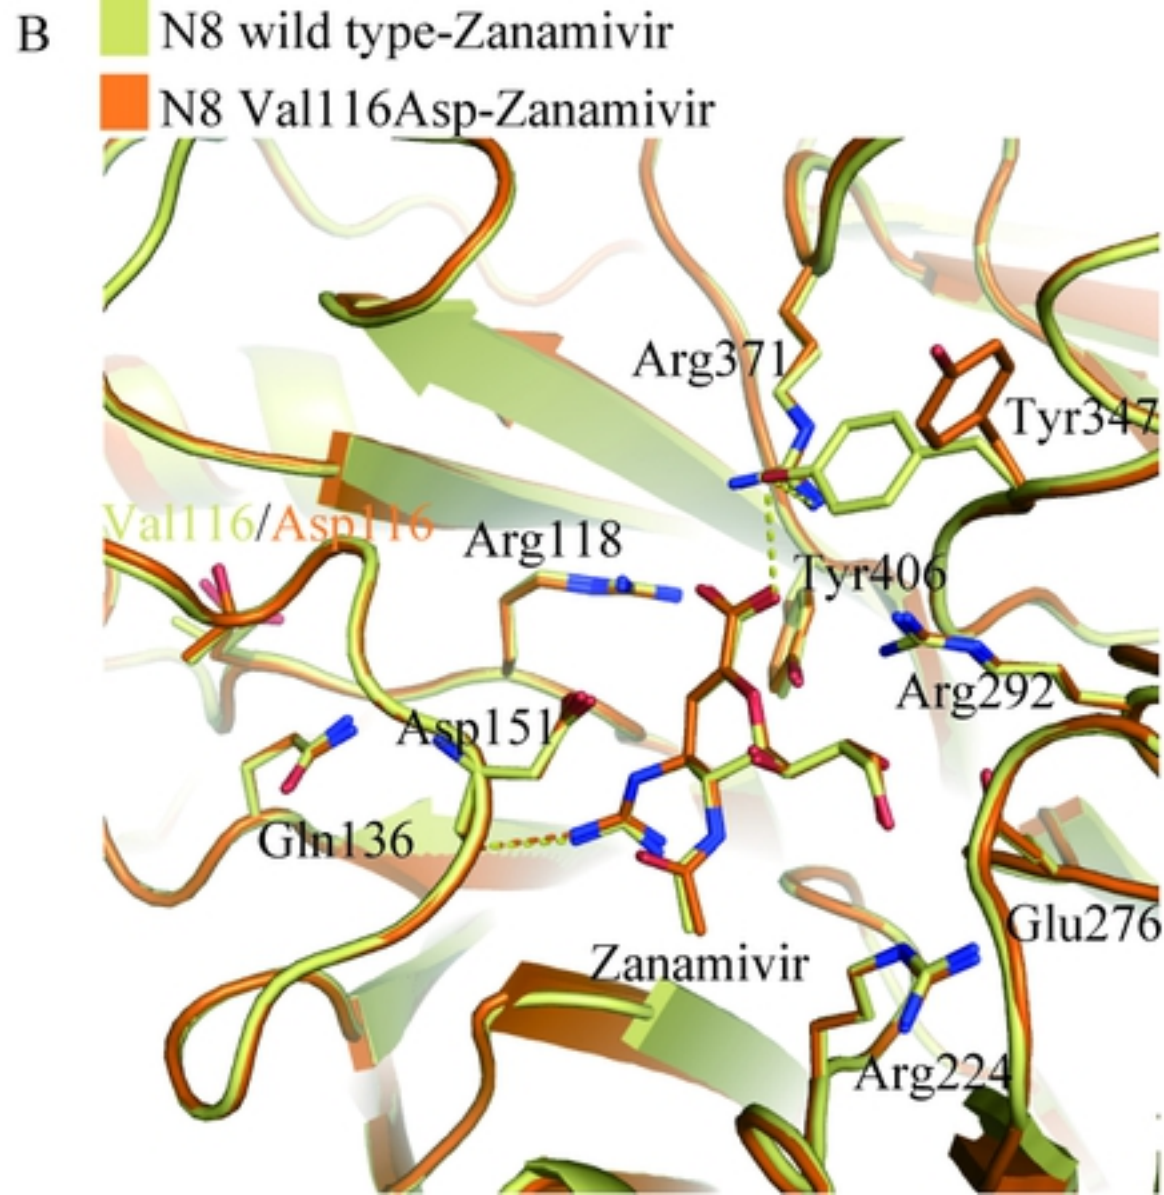

Source: https://www.biorxiv.org/content/early/2018/07/26/378075.full.pdf
